# Supplementary material
Source: publisher figshare collection journal article supplement (https://geolsoc.figshare.com/ndownloader/files/14358575)
Supplement: Supplementary file 1 [file 14358575]

## Sheet: Sheet1
Table S20 Sandstone chemistry ch. 10 MurihikuTerrane ICP-MS
Sample name	N14-19	N14-20		N14-1	N14 3	N14-9	N14-11		N14-220	N14-95
Rock type	med. sandstone	med. sandstone		fine sandstone	med. sandstone	med. sandstone	med. sandstone		med. sandstone	sandstone
Region	Mataora "Island" area, Southland (Permian)	Mataora "Island" area, Southland (Permian)		Nugget Point, Southland, Triassic	Nugget Point, Southland, Triassic	Nugget Point, Southland, Triassic	Nugget Point, Southland, Triassic		Wairora River, Richmond area	Wairora River, Richmond area
GPS	E21 86061 N54 08807	E21 85941 N54 08618		E22 63953 N54 13193		E22 64133 N54 13695	E22 63686 N54 13085		E25 21144 N59 78768	E21 19305 N54 79250
Ba	168	149		37	501	566	414		454	345
Be	2	1		1	3	4	4		2	2
Co	12.8	50.5		66.4	24.5	14.8	17.8		15.8	21.7
Cs	1.5	1.4		0.1	6.1	5	1.7		2.5	4.1
Ga	12.6	13.3		16.9	21.5	22.5	13		24.7	18.9
Hf	1.8	2.3		3.1	4.4	5	4.6		5.5	4.1
Nb	2.8	2.2		6.7	8.2	9.2	6.1		6.5	5.8
Rb	37	27.9		11	126.7	112.7	37.1		64.6	91
Sn	1	1		1	3	3	2		2	2
Sr	317.1	371		607.9	194.8	209.9	92.7		188.4	132.6
Ta	0.3	0.6		4.5	2.6	0.8	0.8		1.9	0.9
Th	2.7	2.2		0.4	11.9	13	8.5		7.7	8.2
U	0.8	1		0.4	2.6	3.4	2.5		2.2	2
V	105	128		396	160	146	49		102	128
W	20.4	51		342.4	214.7	59.4	239.6		132.3	38.6
Zr	71.9	84		121.2	154	191.2	160		214.6	153.2
Y	18.5	22.2		39.1	20.1	27.1	16.8		20.2	17.7
La	9.1	8.9		6.5	22	27.4	16.6		11.9	16.3
Ce	19.4	17.1		15.9	50.4	59.2	38.5		25.7	34.7
Pr	2.66	2.54		2.56	5.61	6.92	4.47		3.27	3.99
Nd	11.4	11.8		12.9	21.8	26.9	18.5		12.4	16
Sm	2.55	2.78		4.22	4.56	5.71	3.76		3.2	3.35
Eu	0.72	0.84		1.37	1.05	1.15	0.94		0.77	0.92
Gd	2.94	3.45		5.88	4.11	5.25	3.49		3.04	3.44
Tb	0.5	0.58		1.12	0.65	0.81	0.55		0.55	0.54
Dy	3	3.61		6.95	3.72	4.76	2.92		3.48	3.2
Ho	0.6	0.78		1.62	0.77	0.98	0.6		0.75	0.7
Er	1.9	2.19		4.48	2.14	2.77	1.65		2.4	2.08
Tm	0.26	0.33		0.7	0.33	0.4	0.25		0.38	0.31
Yb	1.84	2.36		4.41	2.24	2.79	1.88		2.67	2.18
Lu	0.28	0.36		0.73	0.33	0.43	0.29		0.44	0.34
Eu/Eu*	0.804023	0.82933		0.840922	0.741593	0.642214	0.793416		0.754847	0.82864
Th/U	3.375	2.2		1	4.57692	3.82353	3.4		3.5	4.1
